# Supplementary material
Source: Springer Nature journal article supplement (https://www.springermedizin.de/resource/supplementary/13023_2010_277_MOESM1_ESM.pdf/9642006)
Supplement: MOESM1 [file 9642006]

## Clinical Events/ Diagnosis/ Treatment

Year  
(Age)

1987  
(49)

Abrupt development of nodules and erythematous and purpuric papules in lower extremities, arms, elbows, trunk, thigh and lateral abdominal wall; metacarpophalangeal joint inflammation and episodes of fever, chills and malaise.

**Skin biopsy** of purpuric lesions: **Leukocytoclastic Vasculitis**.

**Alpha-1-antitrypsin Deficiency** (AAT serum levels 24 mg/d, phenotype PiZZ).  
Treatment with colchicine 0.6 mg twice/day and oral prednisone 40 mg/day.

1988  
(50)

Multiple recurrences of cutaneous vasculitis, partially controlled with Prednisone.

1993  
(55)

**Augmentation therapy with AAT:** 60 mg/kg body weight (total: 5.5 grams).

*No other concurrent therapy was used.*

After the first infusion, lesions improved significantly within 2-6 hours and totally resolved within 48 hours.

The patient was clear of lesions for approximately 10 days before a new eruption reappeared. Relapse was again controlled with AAT.

1995  
(57)

The patient continues to receive **Prolastin** (5.5 grams every 1-2 weeks), successfully controlling vasculitis.
